# Supplementary material for: In situ chemical etching of tunable 3D Ni3S2 superstructures for bifunctional electrocatalysts for overall water splitting
Source: Royal Society of Chemistry journal article supplement (doi:10.1039/c6ta05618k), 2016-01-01
Supplement: c6ta05618k1.pdf [file c6ta05618k1.pdf]

## Electronic Supplementary Information

---

### ***In-situ* chemical etching of tunable 3D Ni<sub>3</sub>S<sub>2</sub> superstructures for bifunctional electrocatalysts for overall water splitting**

*Ting Zhu,<sup>a</sup> Liangliang Zhu,<sup>a</sup> Jing Wang,<sup>a</sup> and Ghim Wei Ho\*<sup>abc</sup>*

*<sup>a</sup> Department of Electrical and Computer Engineering, National University of Singapore,  
4 Engineering Drive 3, Singapore 117583*

*Prof. G. W. Ho*

*<sup>b</sup> Engineering Science Programme, National University of Singapore, 9 Engineering Drive 1,  
Singapore 117575*

*<sup>c</sup> Institute of Materials Research and Engineering, A\*STAR (Agency for Science, Technology and  
Research), 3 Research Link, 117602, Singapore*

*\*Corresponding author: Prof. Ghim Wei Ho*

*Email: [elehgw@nus.edu.sg](mailto:elehgw@nus.edu.sg)*

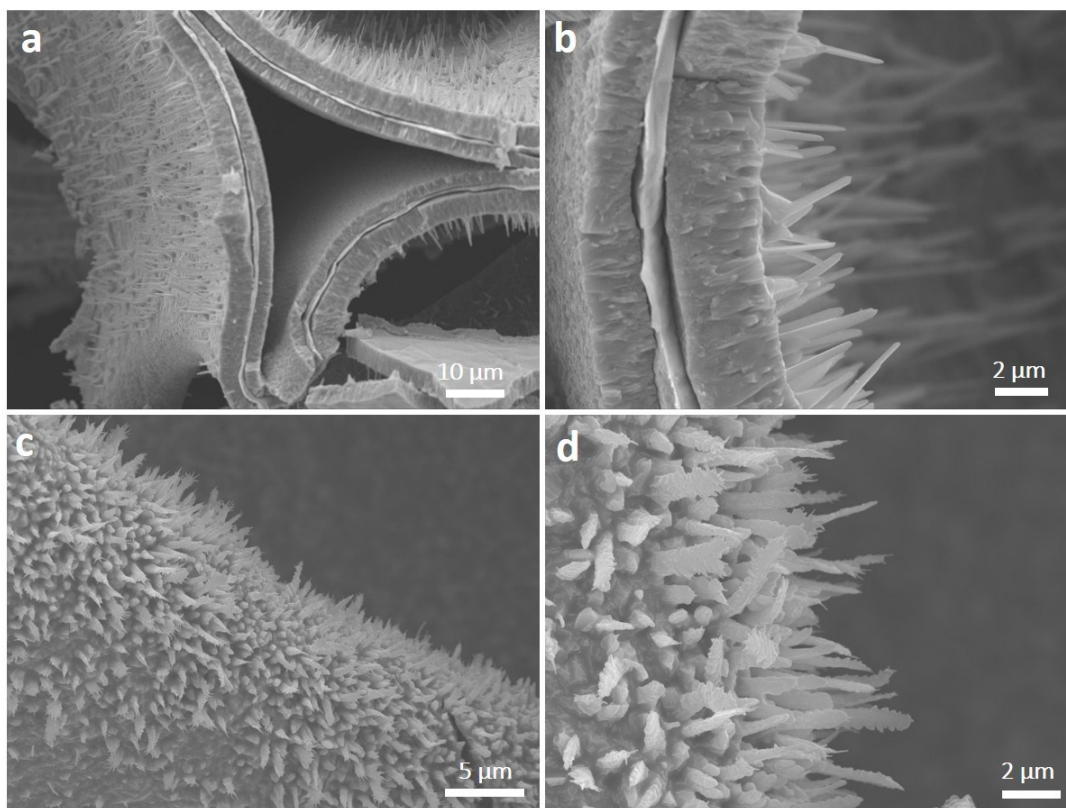

**Fig. S1** SEM images of the NN@NF-2 (a and b) and NL@NF-2 (c and d).

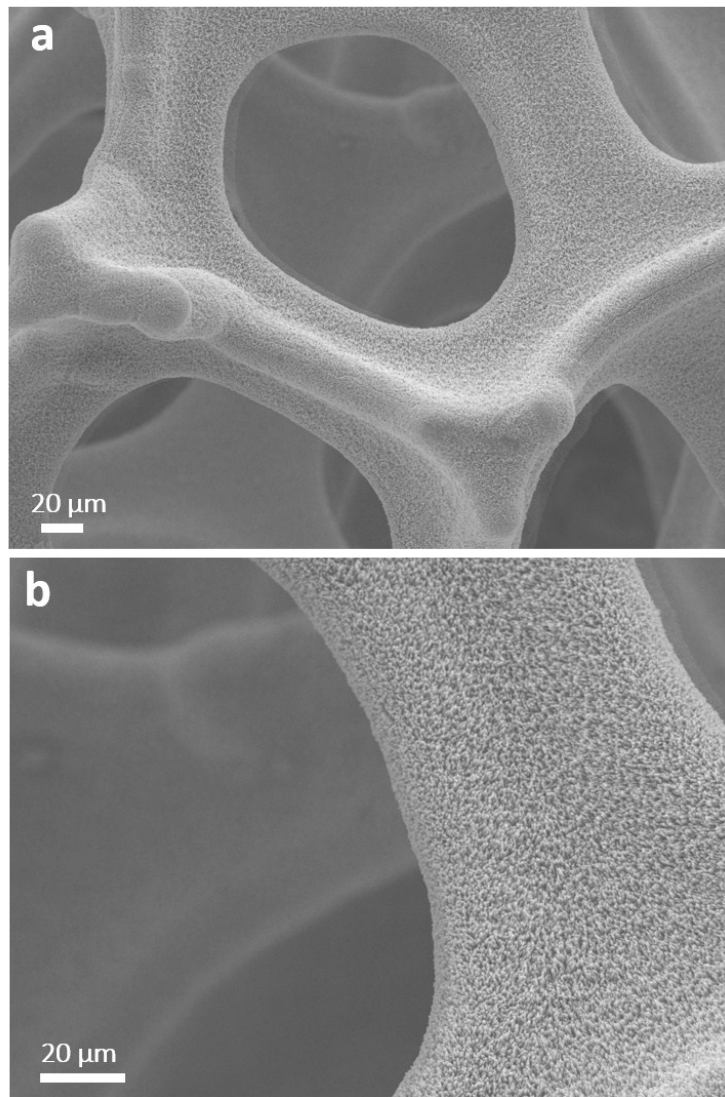

**Fig. S2** Low (a) and high (b) magnification of SEM images of the needle array (NN@NF-1) grown on the outmost surface of NF.

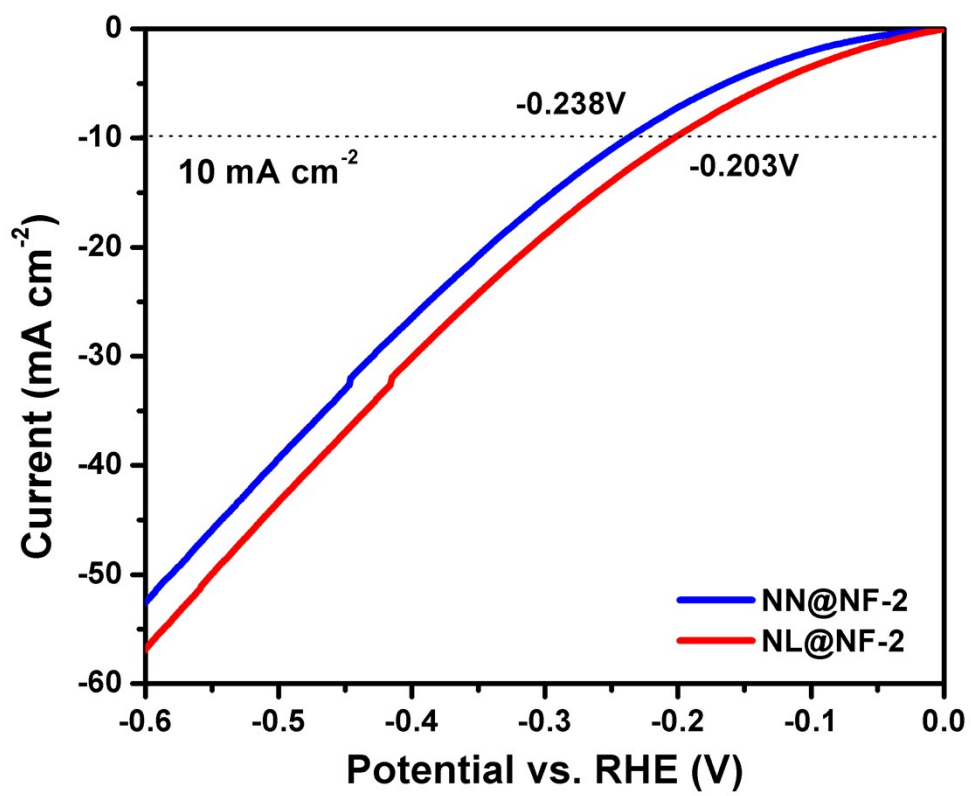

Fig. S3 LSV curves of the NN@NF-2 and NL@NF-2 for HER.

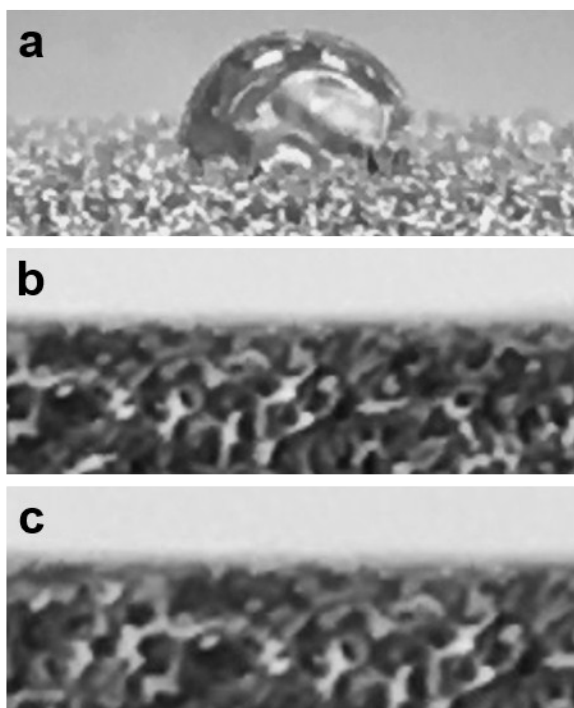

**Fig. S4** Processed digital photos of the hydrophilic property test for pure NF (a), NL@NF-1 (b) and NN@NF-1 (c).

**Table S1** A comparison of HER activity of nickel sulfide based electrocatalysts in previous work

| Catalysts                                       | Substrate    | Electrolyte                          | $\eta$ (mV) at 10 mA cm <sup>-2</sup> | Tafel slope (mV dec <sup>-1</sup> ) | Reference                                                    |
|-------------------------------------------------|--------------|--------------------------------------|---------------------------------------|-------------------------------------|--------------------------------------------------------------|
| Ni <sub>3</sub> S <sub>2</sub> leaves           | Ni foam      | 1 M KOH                              | 182                                   | 89                                  | This work                                                    |
| Ni <sub>3</sub> S <sub>2</sub> Nanorod Array    | Ni foam      | 1 M KOH                              | 200                                   | 107                                 | <i>Electrochimica Acta</i> , 2015, <b>174</b> , 297–301      |
| Ni <sub>3</sub> S <sub>2</sub> Nanosheets array | Ni foam      | 1 M KOH                              | 123                                   | 110                                 | <i>Int. J. Hydrogen Energy</i> , 2015, <b>40</b> , 4727–4732 |
| Iron-nickel sulfide nanosheets                  | N.A.         | 0.5 M H <sub>2</sub> SO <sub>4</sub> | 117                                   | 40                                  | <i>J. Am. Chem. Soc.</i> , 2015, <b>137</b> , 11900–11903    |
| NiS nanoparticles                               | N.A.         | 0.5 M H <sub>2</sub> SO <sub>4</sub> | ~250                                  | 88                                  | <i>Nanoscale</i> , 2015, <b>7</b> , 5157–5163                |
| NiS nanocrystals                                | N.A.         | 0.5 M H <sub>2</sub> SO <sub>4</sub> | 186                                   | 51                                  | <i>RSC Adv.</i> , 2015, <b>5</b> , 104740–104749             |
| NiS <sub>2</sub> nanosheets                     | Graphite     | 0.5 M H <sub>2</sub> SO <sub>4</sub> | 240                                   | 41                                  | <i>RSC Adv.</i> , 2015, <b>5</b> , 32976–32982.              |
| NiS microspheres                                | Ni foam      | 0.1 M KOH                            | 158 <sup>a</sup>                      | 83                                  | <i>Chem. Commun.</i> , 2016, <b>52</b> , 1486–1489           |
| Ni <sub>3</sub> S <sub>2</sub> Nanosheets array | Ni foam      | 1 M KOH                              | 170                                   | N.A.                                | <i>J. Am. Chem. Soc.</i> , 2015, <b>137</b> , 14023–14026    |
| Nickel sulfide film                             | FTO          | Neutral water                        | 330                                   | 77                                  | <i>J. Mater. Chem. A</i> , 2014, <b>2</b> , 19407–19414      |
| Ni-Mo-S nanosheets                              | Carbon fiber | 0.5 M Sodium phosphate               | ~200                                  | 85                                  | <i>Sci. Adv.</i> , 2015, <b>1</b> :e1500259                  |

<sup>a</sup> $\eta$  needed to achieve 20 mA cm<sup>-2</sup>.

**Table S2** A comparison of OER activity of nickel sulfide based electrocatalysts in previous work

| Catalysts                                         | Substrate            | Electrolyte | $\eta$ (mV) at 10 mA cm <sup>-2</sup> | Tafel slope (mV dec <sup>-1</sup> ) | Reference                                                       |
|---------------------------------------------------|----------------------|-------------|---------------------------------------|-------------------------------------|-----------------------------------------------------------------|
| Ni <sub>3</sub> S <sub>2</sub> leaves             | Ni foam              | 1 M KOH     | 340                                   | 150                                 | This work                                                       |
| Ni <sub>3</sub> S <sub>2</sub>                    | Ni foam              | 0.1 M KOH   | 400                                   | 331                                 | <i>Electrochimica Acta</i> , 2015, <b>174</b> , 297–301         |
| Ni <sub>3</sub> S <sub>2</sub> nanorods           | Ni foam              | 0.1 M KOH   | 187                                   | 159                                 | <i>Energy Environ. Sci.</i> , 2013, <b>6</b> , 2921–2924        |
| Fe doped Ni <sub>3</sub> S <sub>2</sub> particles | Ni foam              | 1M KOH      | 253 <sup>a</sup>                      | 65                                  | <i>J. Mater. Chem. A</i> , 2015, <b>3</b> , 23207–23212         |
| NiS nanosheets                                    | Stainless steel mesh | 0.1 M KOH   | 297                                   | 47                                  | <i>ACS Appl. Mater. Interfaces</i> , 2016, <b>8</b> , 5509–5516 |
| Hierarchical nickel sulfide                       | Ni foam              | 1 M KOH     | 180                                   | 96                                  | <i>Adv. Energy Mater.</i> , 2016, <b>6</b> , 1502333            |
| NiS microspheres                                  | Ni foam              | 1 M KOH     | 335 <sup>b</sup>                      | 89                                  | <i>Chem. Commun.</i> , 2016, <b>52</b> , 1486--1489             |
| Ni <sub>3</sub> S <sub>2</sub>                    | N-doped carbon       | 1 M KOH     | 390                                   | 196                                 | <i>Dalton Trans.</i> , 2016, <b>45</b> , 6352-6356              |
| Ni <sub>3</sub> S <sub>2</sub> Nanosheets array   | Ni foam              | 1 M KOH     | 260                                   | N.A.                                | <i>J. Am. Chem. Soc.</i> , 2015, <b>137</b> , 14023–14026       |

<sup>a</sup>  $\eta$  needed to achieve 100 mA cm<sup>-2</sup>.<sup>b</sup>  $\eta$  needed to achieve 50 mA cm<sup>-2</sup>.
